# Supplementary material for: Revisiting the seed-assisted synthesis of zeolites without organic structure-directing agents: insights from the CHA case
Source: Royal Society of Chemistry journal article supplement (doi:10.1039/c9ra10825d), 2020-01-01
Supplement: c9ra10825d1.pdf [file c9ra10825d1.pdf]

# Supporting Information

## Revisiting the Seed-Assisted Synthesis of Zeolite without Organic Structure-Directing Agents: Insights from CHA case

Grandprix T. M. Kadja,<sup>\*a,b,c</sup> Iftitah R. Kadir,<sup>a</sup> Adroit T. N. Fajar,<sup>a</sup> Veinardi Suendo,<sup>a,b</sup> and Rino R. Mukti<sup>a,b,c</sup>

*Division of Inorganic and Physical Chemistry, Institut Teknologi Bandung, Jl. Ganesha No. 10, Bandung, 40132, Indonesia. Tel.: +62 22 2502104. E-mail: [kadja@chem.itb.ac.id](mailto:kadja@chem.itb.ac.id)*

*Research Center for Nanosciences and Nanotechnology, Institut Teknologi Bandung, Jl. Ganesha No. 10, Bandung, 40132, Indonesia.*

*Center for Catalysis and Reaction Engineering, Institut Teknologi Bandung, Jl. Ganesha No. 10, Bandung, 40132, Indonesia.*

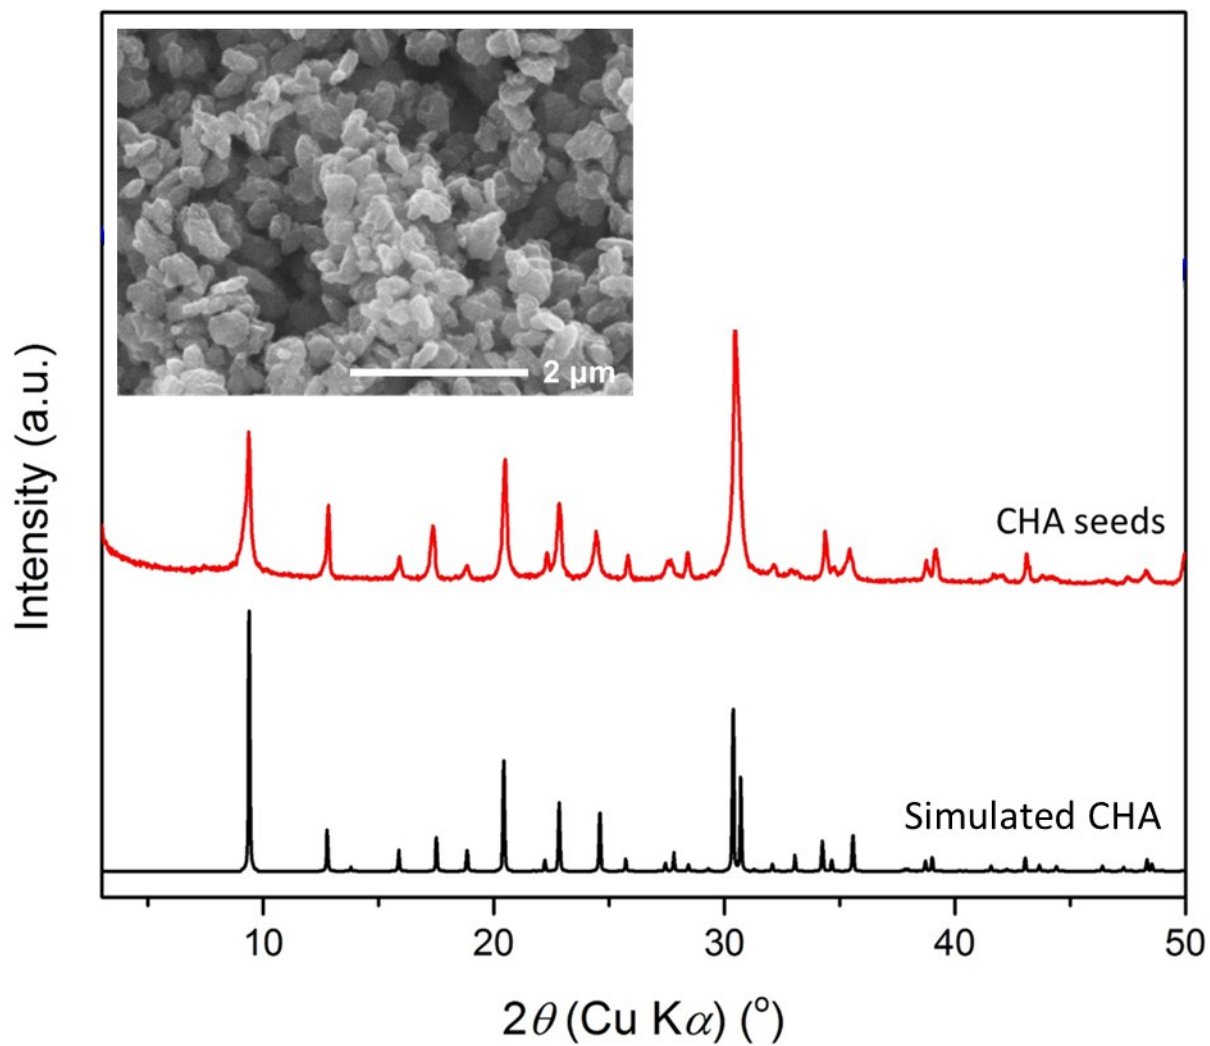

**Figure S1.** XRD patterns of CHA seeds obtained through the interzeolite conversion of FAU zeolite. Inset shows the SEM image of CHA seeds.

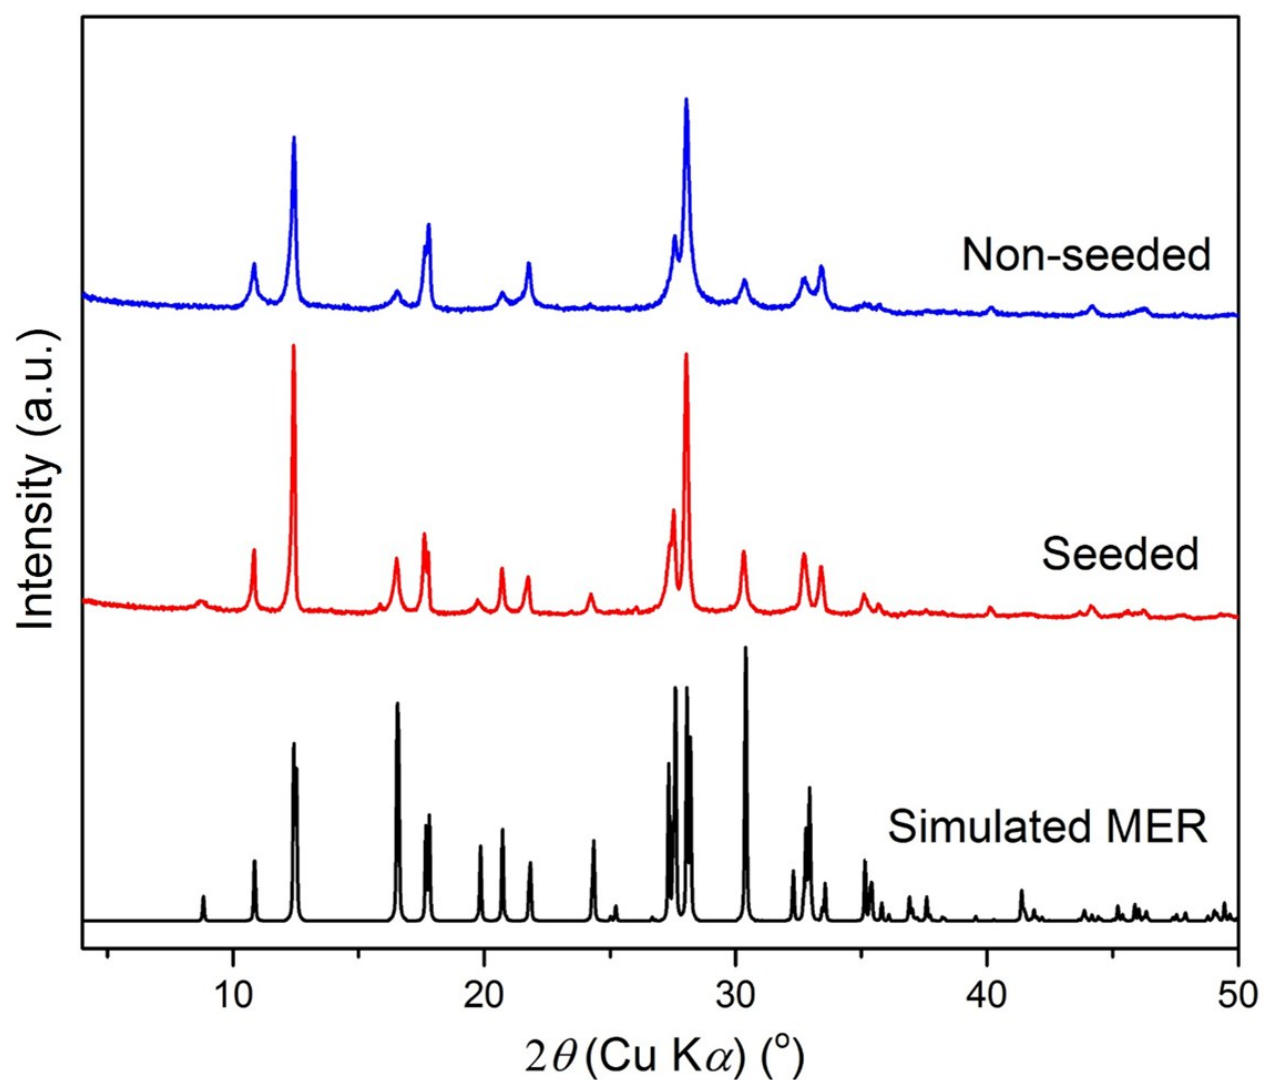

**Figure S2.** XRD patterns of products obtained through hydrothermal synthesis using the following molar compositions, 1 SiO<sub>2</sub>: 0.05 Al<sub>2</sub>O<sub>3</sub>: 0.4 Na<sub>2</sub>O: 0.4 K<sub>2</sub>O: 100 H<sub>2</sub>O, within and without the presence of CHA seeds, at 170 °C for 24 h.

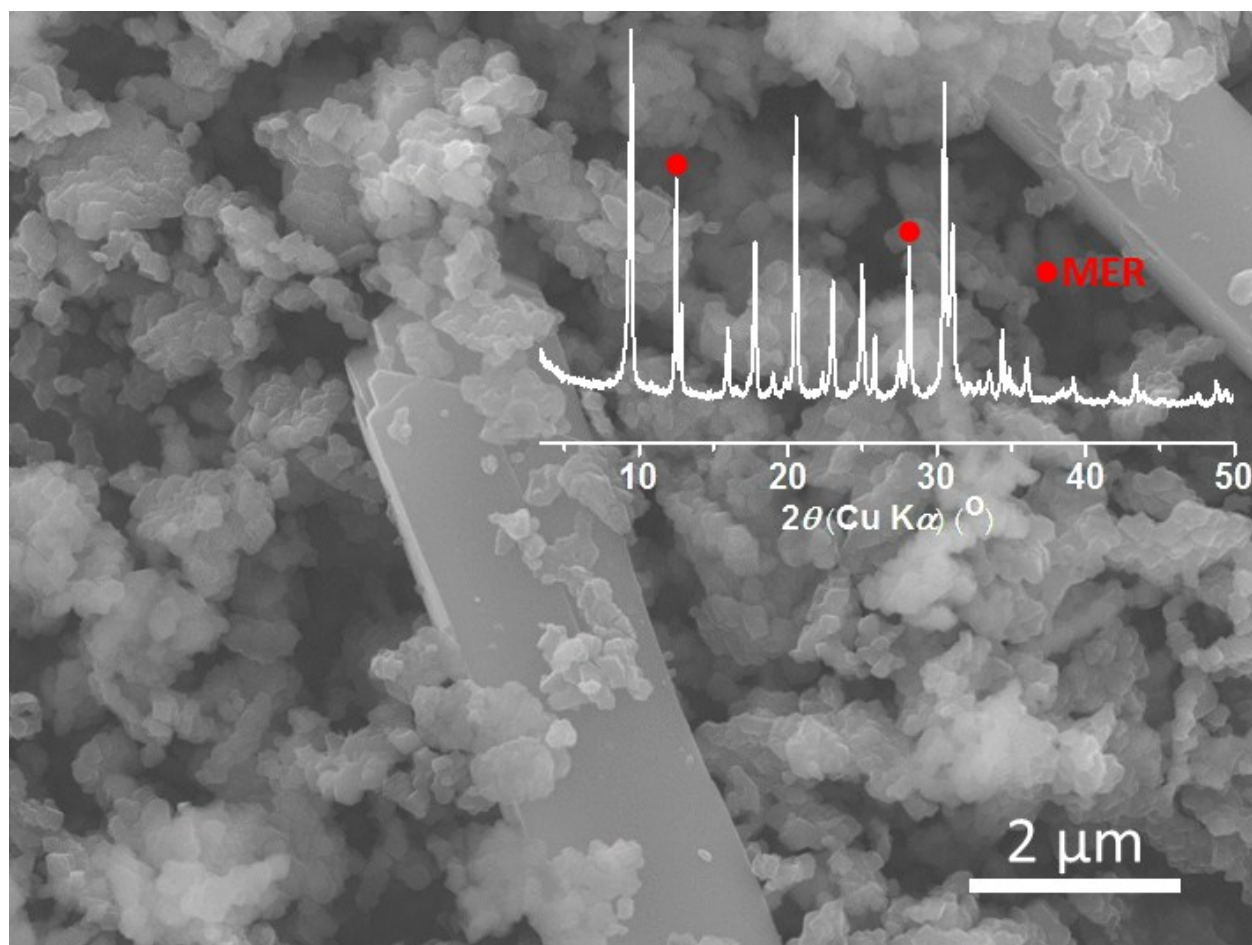

**Figure S3.** SEM image and XRD pattern of products obtained through seed-assisted synthesis using the following molar compositions, , 1  $\text{SiO}_2$ : 0.05  $\text{Al}_2\text{O}_3$ : 0.1  $\text{Na}_2\text{O}$ : 0.3  $\text{K}_2\text{O}$ : 100  $\text{H}_2\text{O}$ , at 170  $^{\circ}\text{C}$  for 24 h.

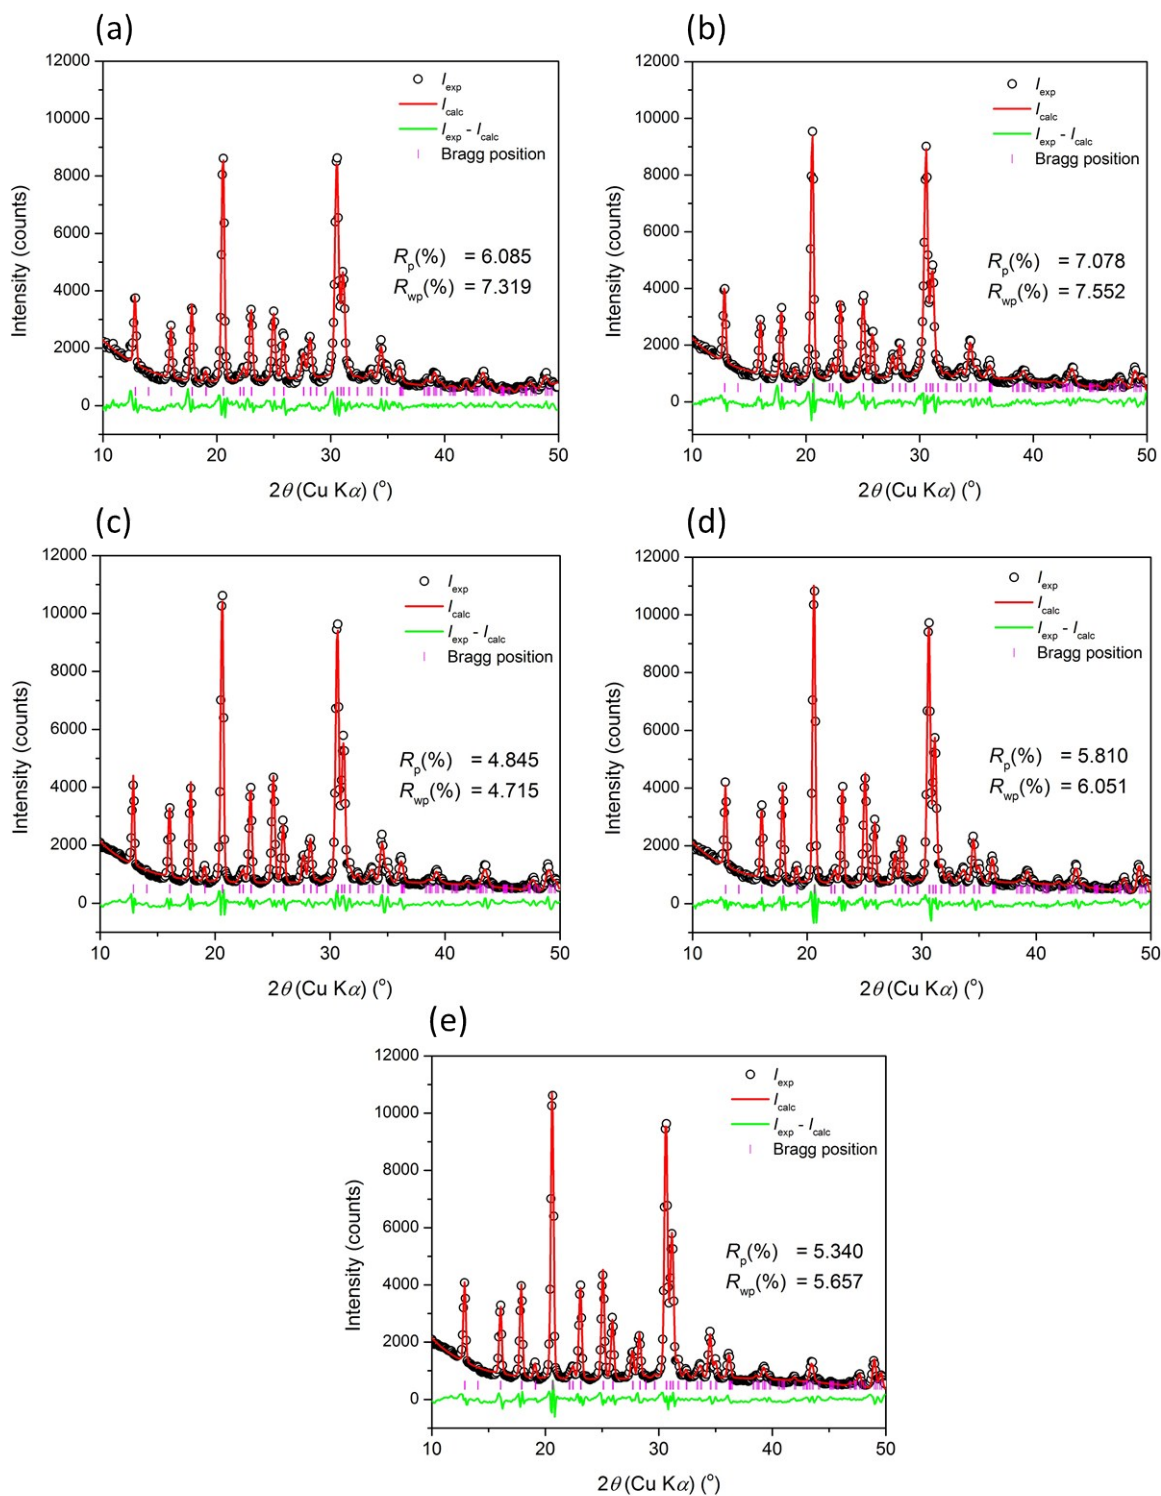

**Figure S4.** Whole pattern fitting using Le Bail method of XRD patterns of products obtained after (a) 6 h, (b) 8 h, (c) 12 h, (d) 18 h and (e) 24 h of hydrothermal treatment of initial mixtures with the following molar compositions, 1 SiO<sub>2</sub>: 0.05 Al<sub>2</sub>O<sub>3</sub>: 0.3 Na<sub>2</sub>O: 0.1 K<sub>2</sub>O: 100 H<sub>2</sub>O, at 170  $^{\circ}$ C.

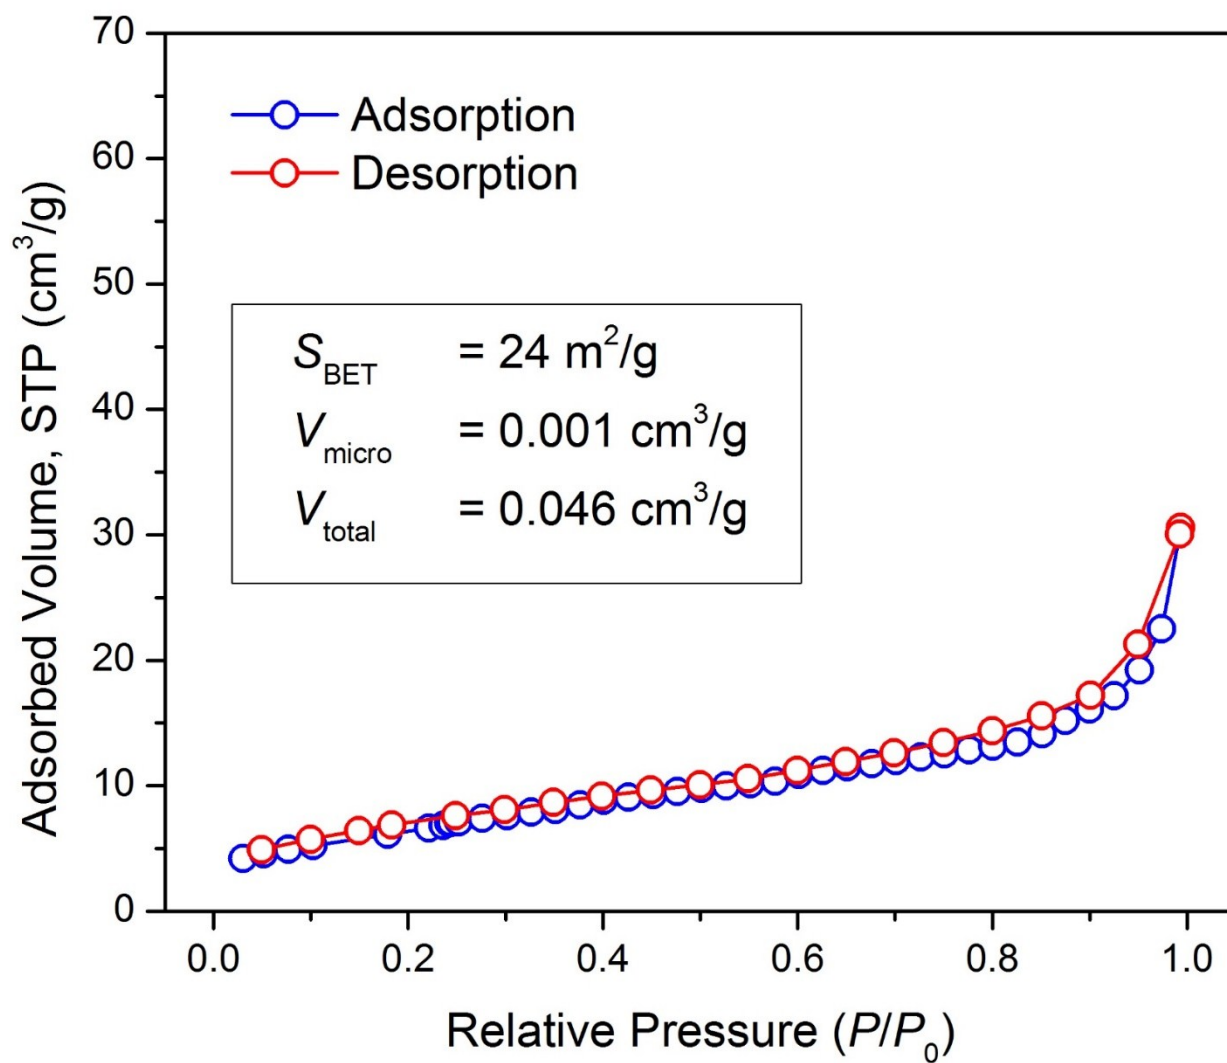

**Figure S5.** N<sub>2</sub> adsorption-desorption isotherm of CHA seeds.

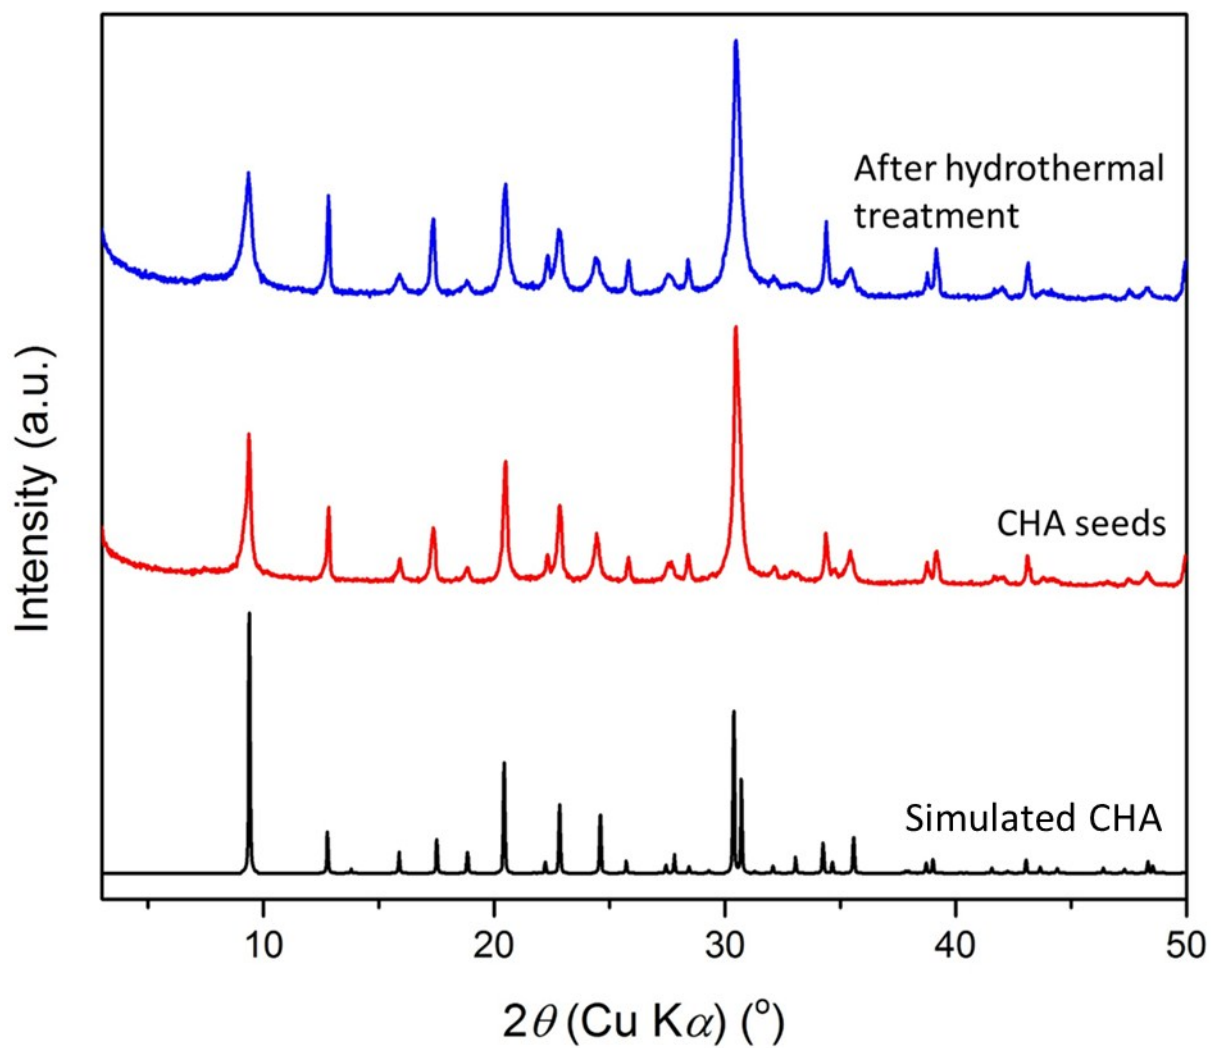

**Figure S6.** XRD patterns of CHA seeds before and after hydrothermal treatment using solution with the following molar compositions, 0.3 Na<sub>2</sub>O: 0.1 K<sub>2</sub>O: 100 H<sub>2</sub>O, at 170 °C for 6 h.

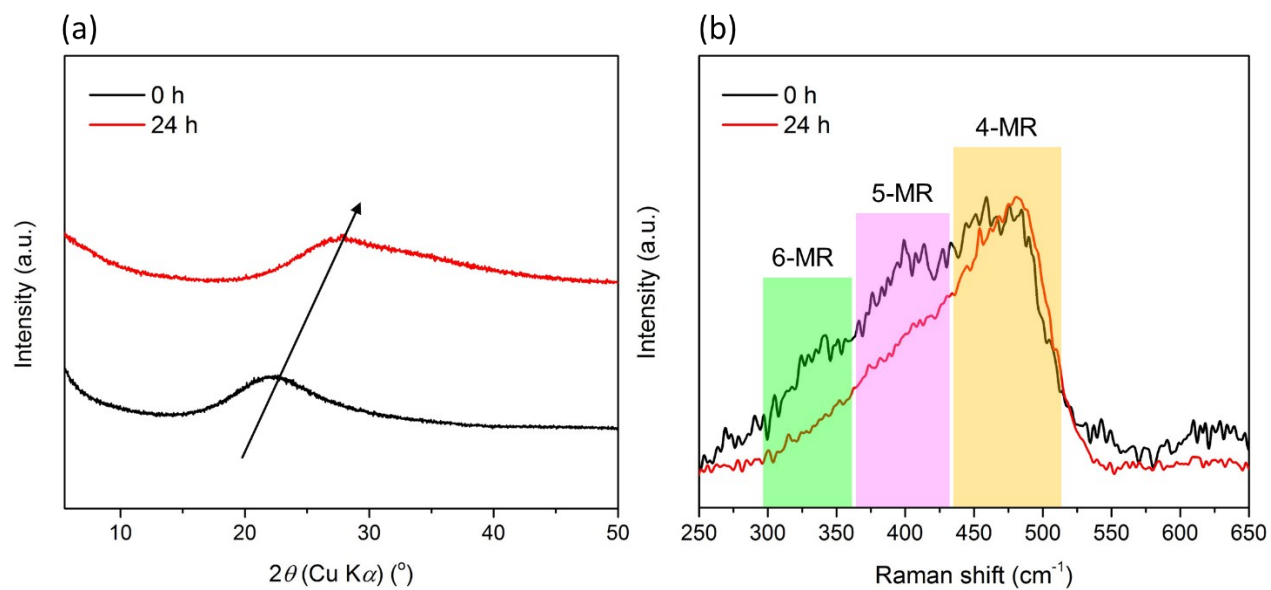

**Figure S7.** (a) XRD patterns and (b) Raman spectra of products obtained through hydrothermal synthesis using the following molar compositions, 1  $\text{SiO}_2$ : 0.05  $\text{Al}_2\text{O}_3$ : 0.3  $\text{Na}_2\text{O}$ : 0.1  $\text{K}_2\text{O}$ : 100  $\text{H}_2\text{O}$ , without the presence of CHA seeds, at 170  $^\circ\text{C}$  for 0 and 24 h.



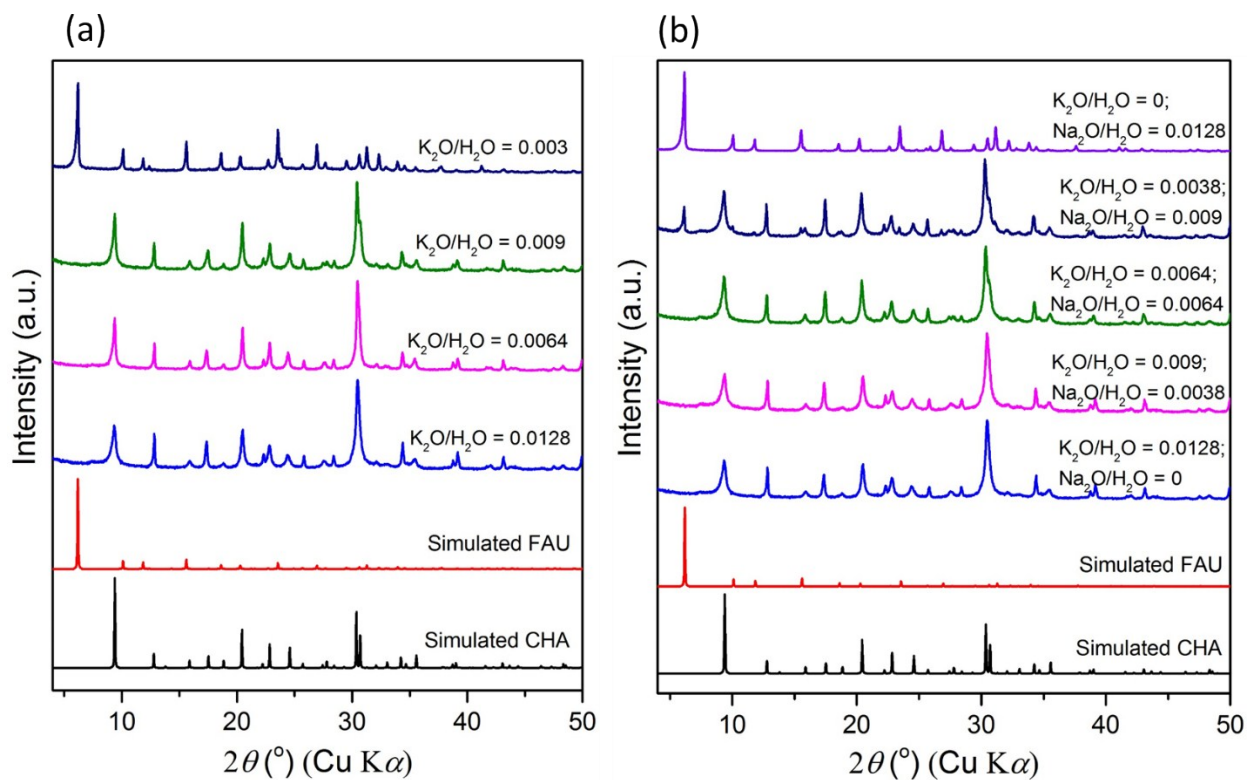

**Figure S8.** XRD patterns of products obtained from attempts on interzeolite conversion of FAU to CHA using solutions with the following molar compositions, (a) 0.003-0.0128  $K_2O$ : 1  $H_2O$  and (b) 0-0.0128  $Na_2O$ : 0-0.0128  $K_2O$ : 1  $H_2O$  with fixed alkalinity, i.e.  $(K_2O+Na_2O)/H_2O = 0.0128$ , heated at 95  $^{\circ}C$  for 96 h.

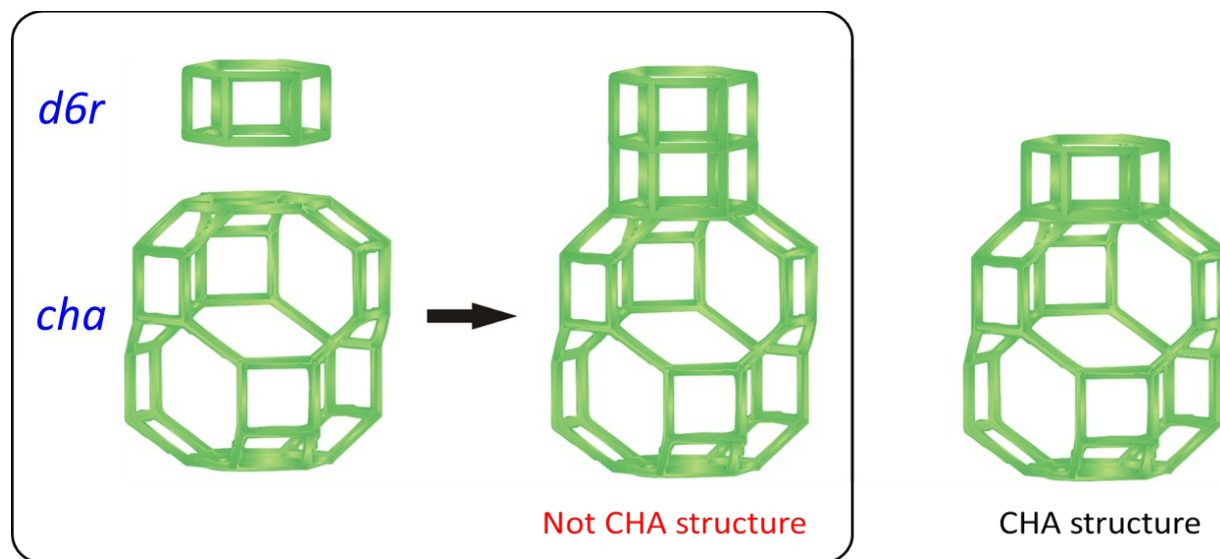

**Figure S9.** Illustration of the formation of a structure if *t-hpr* and *t-cha* are combined. CHA structure is shown for comparison.

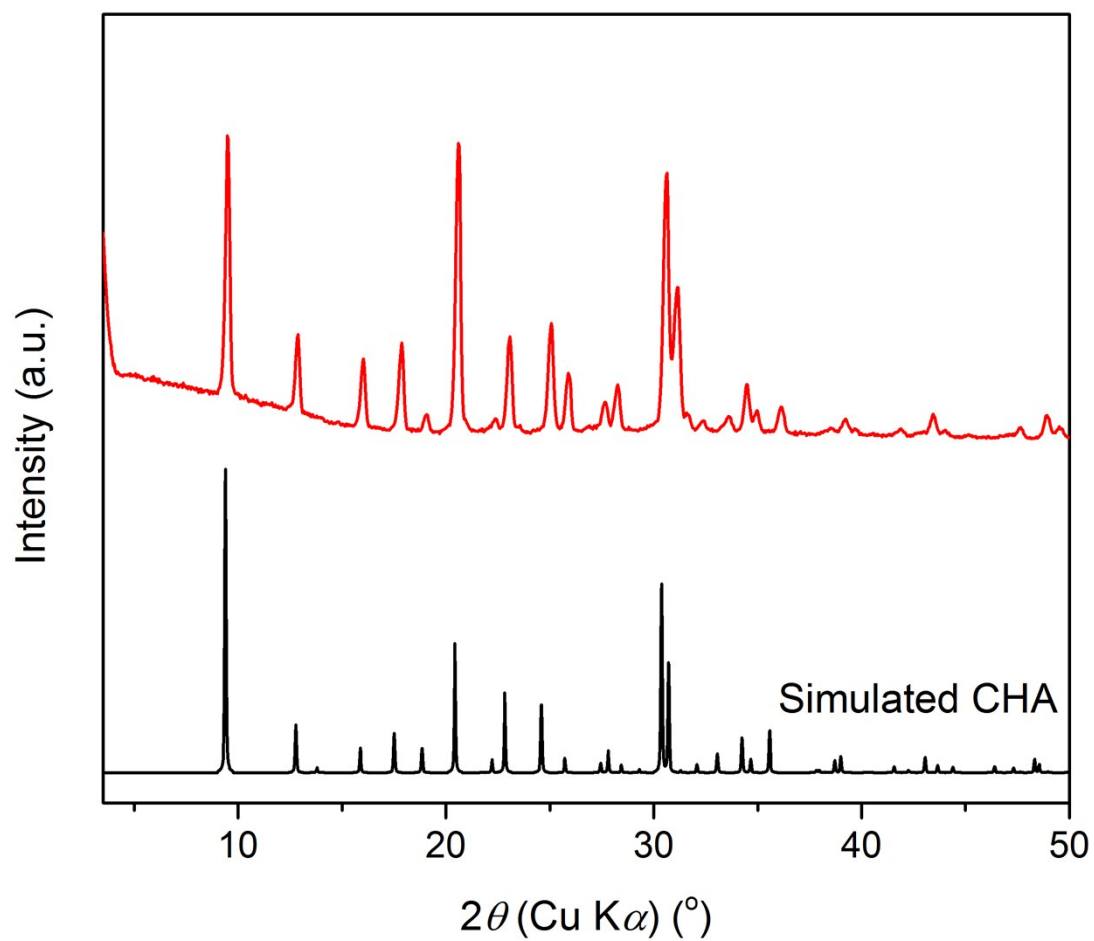

**Figure S10.** XRD patterns of products obtained zeolite through the seed-assisted synthesis, in which the employed seeds are CHA zeolite obtained through the previous seed-assisted synthesis.
